# Supplementary material for: Genome-wide identification and expression profiling of DREB genes in Saccharum spontaneum
Source: Springer Nature journal article supplement (doi:10.1186/s12864-021-07799-5), 2021-06-17
Supplement: 12864_2021_7799_MOESM2_ESM.pdf [file 12864_2021_7799_MOESM2_ESM.pdf]

DREB1s

Table of DREB1 protein sequences from various species (Ss, Os) and domains (NLS, AP2/ERF, DSWA). Includes consensus sequence and residue positions.

Table of DREB1 protein sequences (continued) from various species and domains. Includes consensus sequence and residue positions.

Table of DREB1 protein sequences (continued) from various species and domains. Includes consensus sequence and residue positions.

DREB2s

Table of DREB2 protein sequences from various species (Ss, Os) and domains (NLS, CMV-1, AP2/ERF). Includes consensus sequence and residue positions.

Table of DREB2 protein sequences (continued) from various species and domains. Includes consensus sequence and residue positions.

Table of DREB2 protein sequences (continued) from various species and domains. Includes consensus sequence and residue positions.

Table of DREB2 protein sequences (continued) from various species and domains. Includes consensus sequence and residue positions.
