# Supplementary material for: Genome-wide identification and expression profiling of DREB genes in Saccharum spontaneum
Source: Springer Nature journal article supplement (doi:10.1186/s12864-021-07799-5), 2021-06-17

**a****SsDREB1E**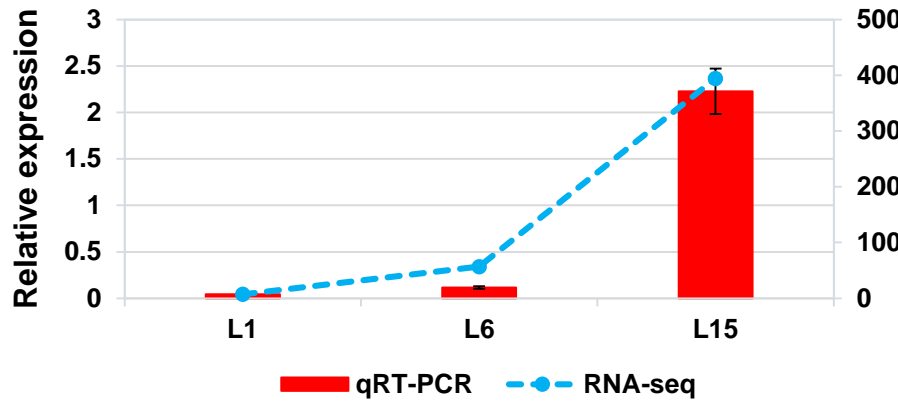**SsDREB1F**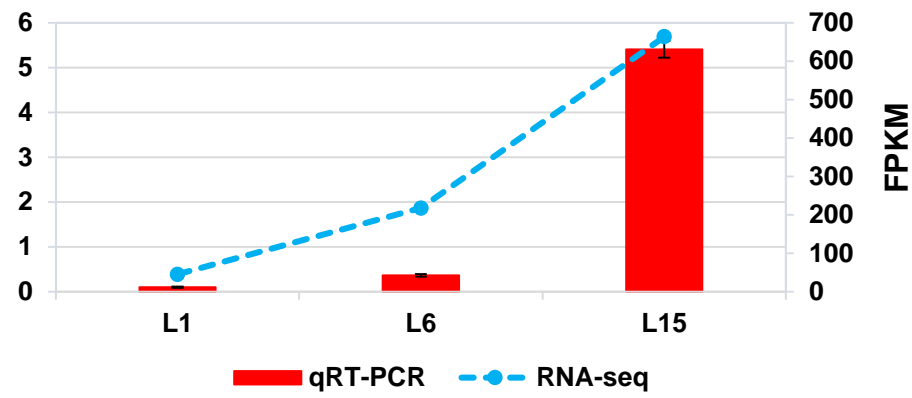**SsDREB1H**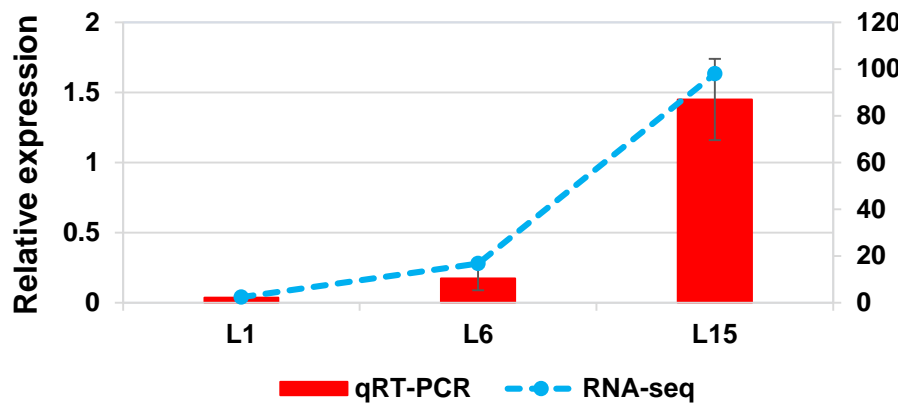**SsDREB2F**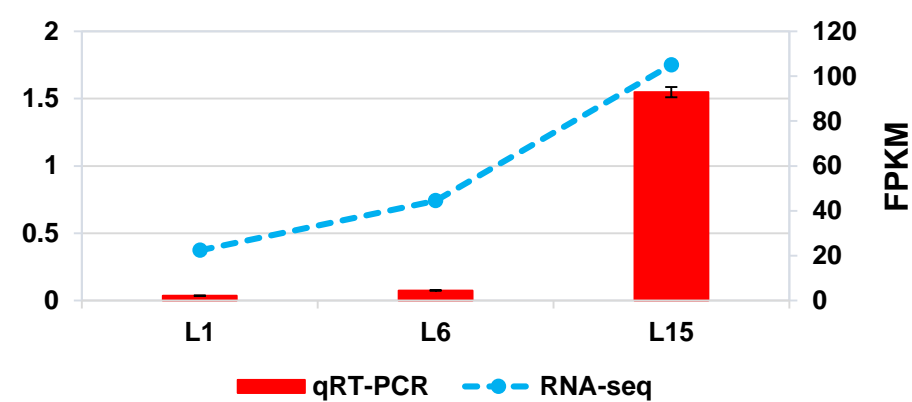**b**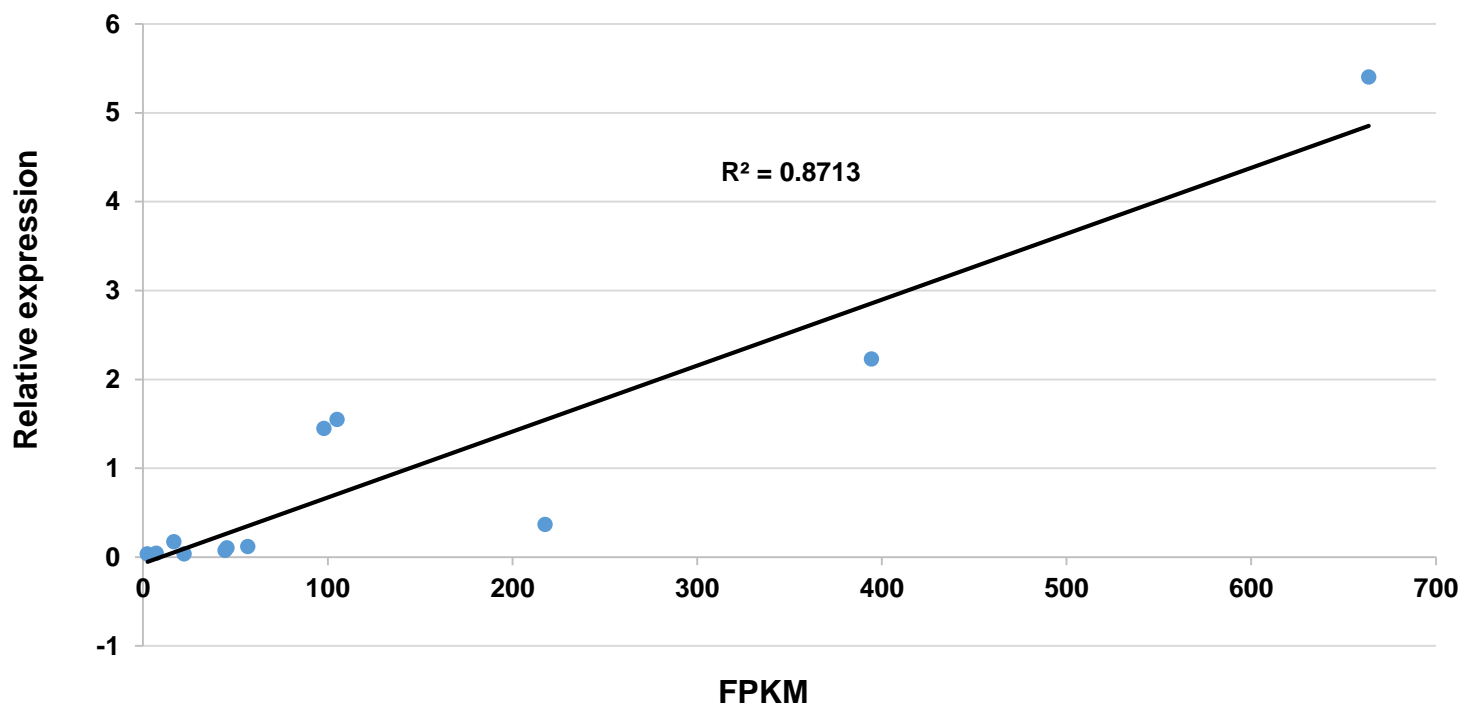

Supplement: 12864_2021_7799_MOESM4_ESM.pdf [file 12864_2021_7799_MOESM4_ESM.pdf]
